# Supplementary material for: Dopamine neuron ensembles signal the content of sensory prediction errors
Source: eLife journal article supplement (doi:10.7554/elife.49315), 2019-11-01
Supplement: supp [file elife-49315-supp-v1.zip]

Archive with 1 entries (1 files):
- elife_poa_e49315_Transparent_Reporting_File.pdf
